# Supplementary material
Source: Springer Nature journal article supplement (https://www.springermedizin.de/resource/supplementary/13058_2011_2982_MOESM6_ESM.pdf/9702998)

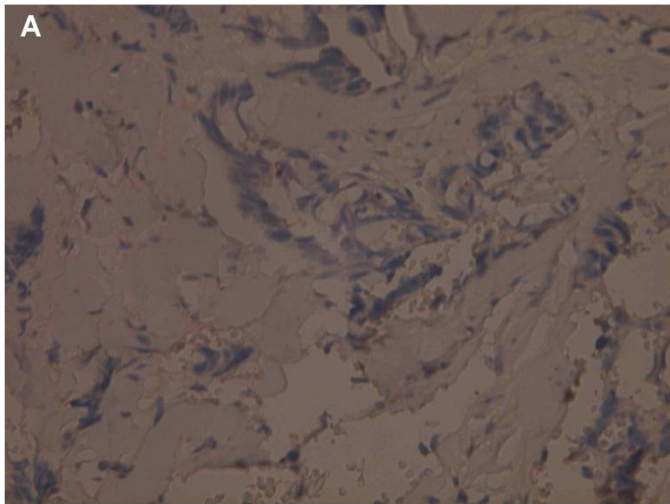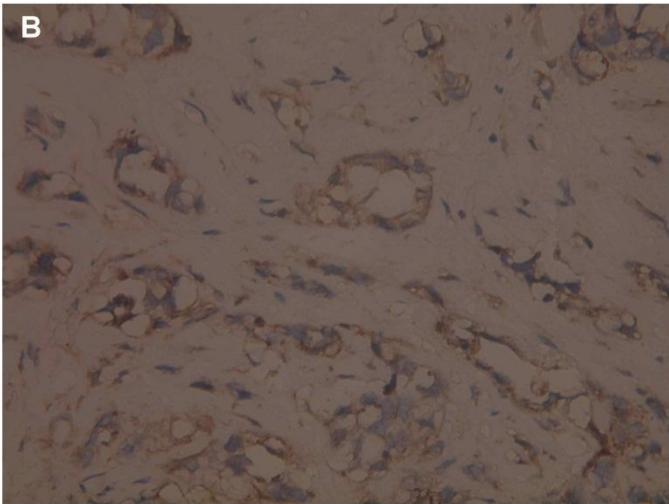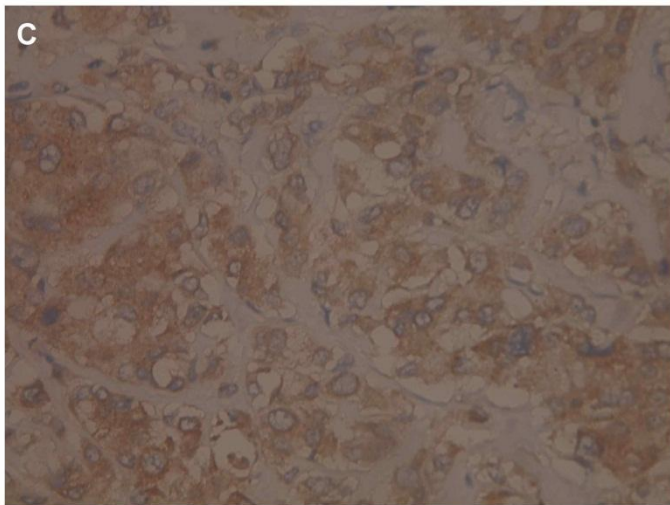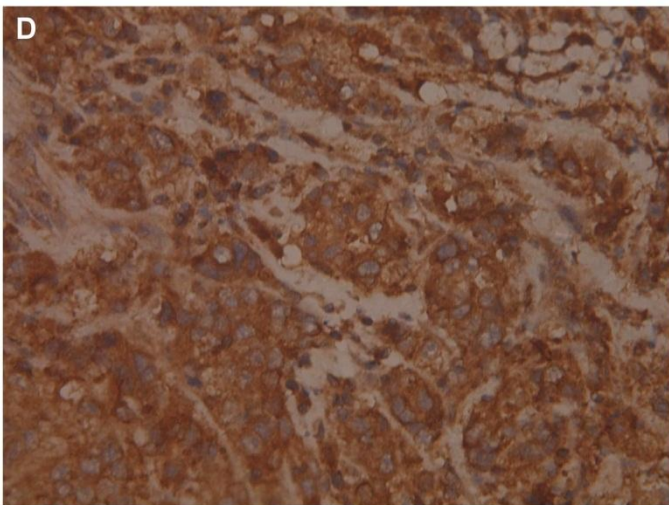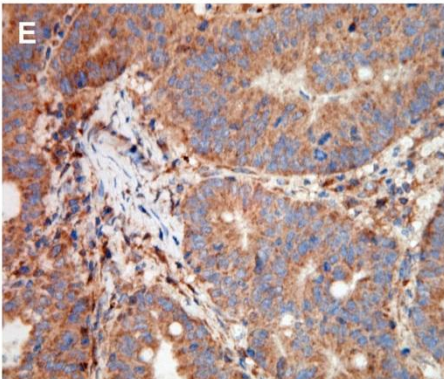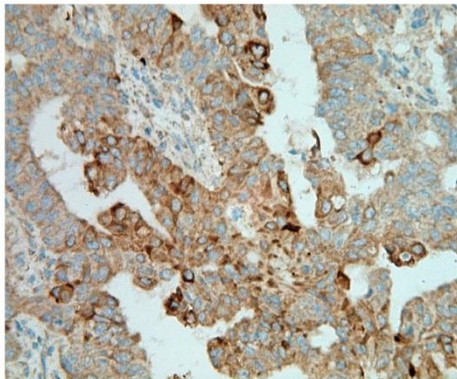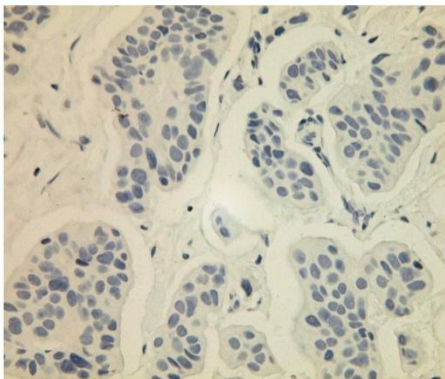

Supplement: MOESM6 [file 9702998]
